# Supplementary material for: RNA virus interference via CRISPR/Cas13a system in plants
Source: PubMed Central journal article supplement (PMC5755456; doi:10.1186/s13059-017-1381-1), 2018-01-04
Supplement: 13059_2017_1381_MOESM1_ESM.pdf [file 13059_2017_1381_MOESM1_ESM.pdf]

# ADDITIONAL FILE 1

## RNA virus interference via CRISPR/Cas13a system in plants

Rashid Aman<sup>1,3</sup>, Zahir Ali<sup>1,3</sup>, Haroon Butt<sup>1,3</sup>, Ahmed Mahas<sup>1</sup>, Fatimah Aljedaani<sup>1</sup>, Muhammad Zuhaib Khan<sup>1</sup>, Shouwei Ding<sup>2</sup>, and Magdy Mahfouz<sup>1,\*</sup>

<sup>1</sup>Laboratory for Genome Engineering, Division of Biological Sciences, 4700 King Abdullah University of Science and Technology, Thuwal 23955-6900, Saudi Arabia, and <sup>2</sup>Center for Plant Cell Biology, Department of Microbiology and Plant Pathology, University of California, Riverside, CA 92521

\*Corresponding author: Magdy M. Mahfouz ([magdy.mahfouz@kaust.edu.sa](mailto:magdy.mahfouz@kaust.edu.sa))

### Additional file 1

**Figure S1: Confirmation of *pCas13a* expression in *planta*.**

**Figure S2: pCas13a-mediated interference with TuMV-GFP in *planta*.**

**Figure S3: GFP quantification of TuMV-GFP interference in transgenic pCas13a-OE plants.**

A

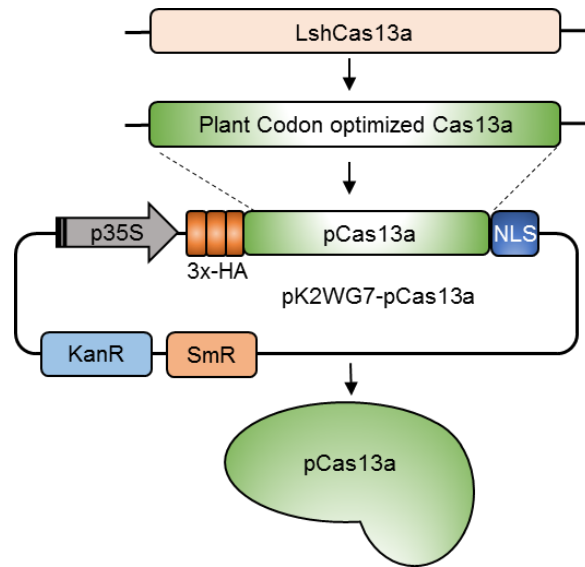

B

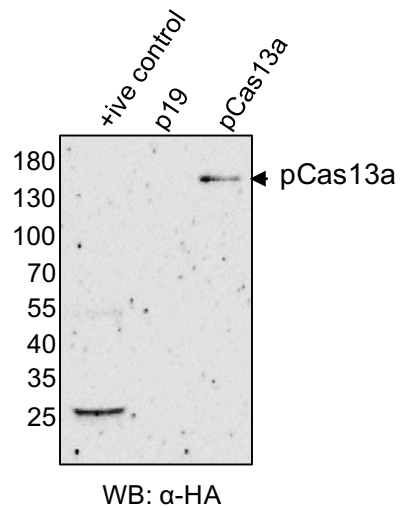

**Figure S1. Confirmation of *pCas13a* expression in *planta*.**

- A) Schematic for the expression of Cas13a in *planta*. The *LshCas13a* was plant codon optimized (*pCas13a*) and cloned into the binary vector *pK2GW7*.
- B) Proteins were extracted from *N. benthamiana* leaves infiltrated with *Agrobacterium* having the binary construct *pK2GW7-pCas13a* and p19. The protein blot was developed for the detection of HA-pCas13a with anti-HA antibody. The *N. benthamiana* line expressing an unrelated 27-kDa HA-

tagged protein was used as positive control. P19 alone was used as the negative control. The arrow indicates the detection of the expected size 171 kDa pCas13a.

A

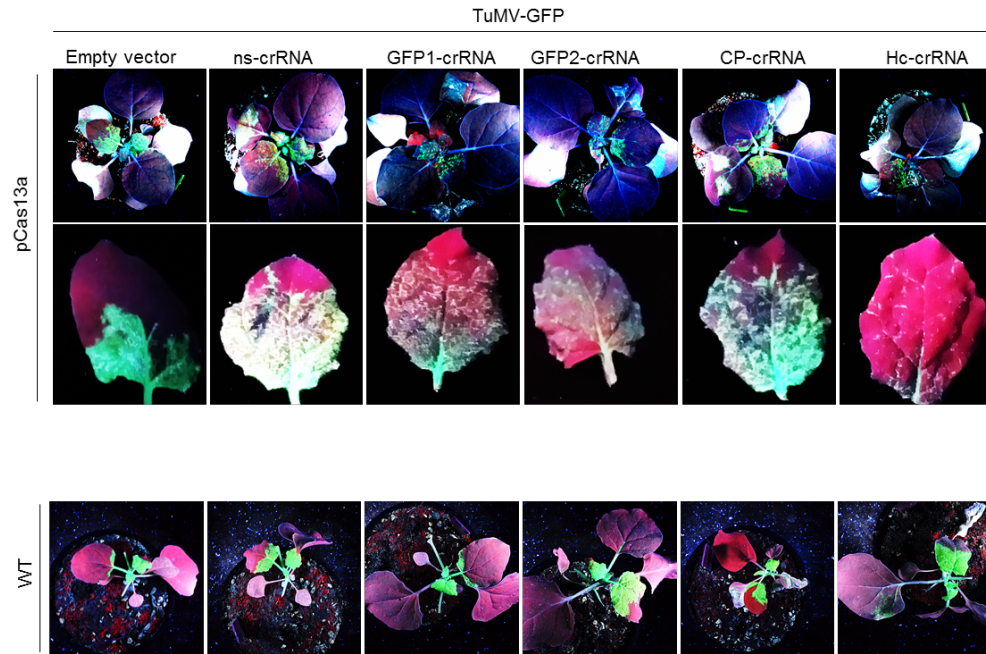

B

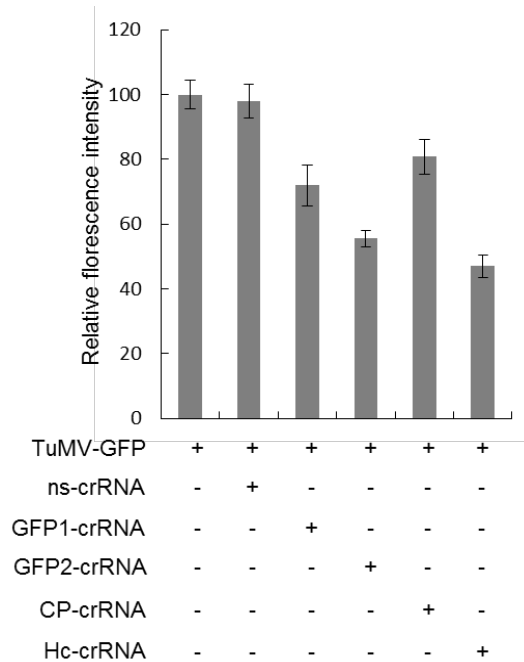

**Figure S2. pCas13a-mediated interference with TuMV-GFP in *planta*.**

A) GFP imaging of the viral interference in plants transiently expressing pCas13a and crRNA. *Agrobacterium* containing the *pK2GW7-pCas13a*, TuMV-GFP and TRV expressing crRNA (against GFP, HC-pro and CP of TuMV-GFP) were infiltrated into wild-type *N. benthamiana*.

Plants were imaged under UV-light for the systemic spread of TuMV-GFP at 7 dai. The representative third leaf of individual plants are shown in the middle panel. The lower panel represents the WT *N. benthamiana* infiltrated with TuMV-GFP and TRV expressing the respective crRNAs without pCas13a.

- B) Relative interference of TuMV-GFP. The GFP intensity was used as relative reference to measure the pCas13a-mediated interference of TuMV-GFP. GFP signal was quantified for the reduction of the TuMV-GFP in plants ( $n=5$ ).

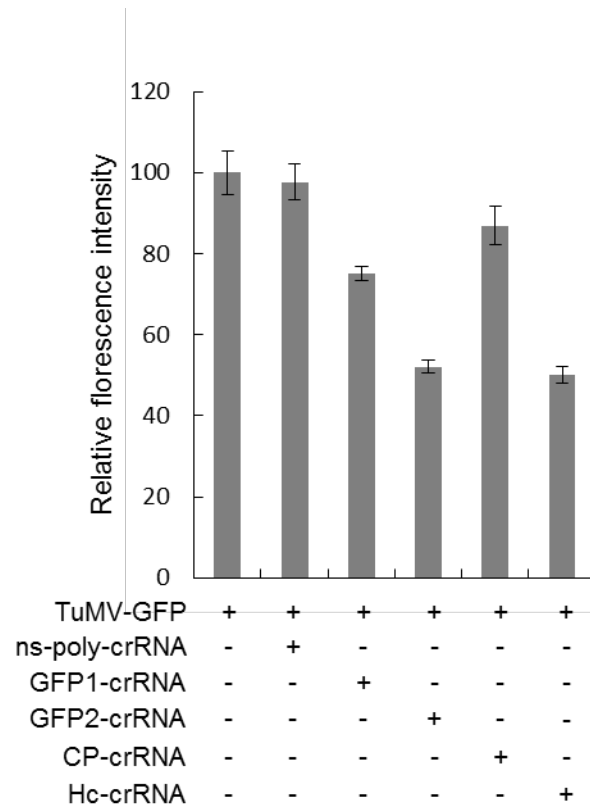

**Figure S3. GFP quantification of TuMV-GFP interference in transgenic pCas13a-OE plants.**

The GFP signal (plants  $n=5$ ) was used for the generation of graph representing the comparative reduction of the GFP signal upon targeting.
